# Supplementary material for: Association between Gray and White Matter Lesions and Its Involvement in Clinical Symptoms of Alzheimer’s-Type Dementia
Source: MDPI journal article supplement (doi:10.3390/jcm12247642), 2023-12-12
Supplement: s1 [file s1]

**Supplemental Table 1.** Logistic regression analysis for rhGM and WML in subcategories of cognitive impairment.

| Subcategories of cognitive impairment | Affected lesions              | Estimated value of parameter (r) | p       |
|---------------------------------------|-------------------------------|----------------------------------|---------|
| <b>Disorientation</b>                 | L. anterior horn PVWML        | 1.51E-05                         | 0.9352  |
|                                       | R. anterior horn PVWML        | -0.0002451                       | 0.1688  |
|                                       | L. posterior horn PVWML       | 0.00071261                       | 0.2209  |
|                                       | R. posterior horn PVWML       | 0.00013688                       | 0.7794  |
|                                       | L. frontal DWML               | 3.81E-05                         | 0.8876  |
|                                       | R. frontal DWML               | -1.8561e-6                       | 0.9955  |
|                                       | L. parieto-occipital DWML     | 0.00014592                       | 0.4732  |
|                                       | R. parieto-occipital DWML     | -0.0002164                       | 0.2553  |
|                                       | L. superior frontal           | 0.27602798                       | 0.6994  |
|                                       | R. superior frontal           | 1.34439828                       | 0.0736  |
|                                       | L. middle frontal             | -0.6489697                       | 0.1139  |
|                                       | R. middle frontal             | 0.02600387                       | 0.9565  |
|                                       | L. medial frontal             | -0.4051143                       | 0.66    |
|                                       | R. medial frontal             | -0.6636418                       | 0.4969  |
|                                       | L. precuneus                  | -0.017222                        | 0.8795  |
|                                       | R. precuneus                  | -0.0265759                       | 0.9115  |
|                                       | L. medial temporal cortex     | 0.14533147                       | 0.4865  |
|                                       | R. medial temporal cortex     | -0.9594174                       | 0.0010* |
|                                       | L. posterior cingulate cortex | -0.0830059                       | 0.7798  |
|                                       | R. posterior cingulate cortex | -0.1620319                       | 0.6238  |
| <b>Disturbed attention</b>            | L. anterior horn PVWML        | -0.0002258                       | 0.2365  |
|                                       | R. anterior horn PVWML        | 7.44E-05                         | 0.68    |
|                                       | L. posterior horn PVWML       | -0.0011401                       | 0.0566  |
|                                       | R. posterior horn PVWML       | 0.00105033                       | 0.0378* |
|                                       | L. frontal DWML               | 0.00014012                       | 0.6093  |
|                                       | R. frontal DWML               | -0.0002904                       | 0.3917  |
|                                       | L. parieto-occipital DWML     | 0.00025673                       | 0.2107  |
|                                       | R. parieto-occipital DWML     | -5.0163e-5                       | 0.794   |

|                                       |                               |            |         |
|---------------------------------------|-------------------------------|------------|---------|
|                                       | L. superior frontal           | 1.5468744  | 0.0370* |
|                                       | R. superior frontal           | -0.1504435 | 0.8485  |
|                                       | L. middle frontal             | -1.4528986 | 0.0036* |
|                                       | R. middle frontal             | -0.2400132 | 0.6197  |
|                                       | L. medial frontal             | -1.8434036 | 0.0546  |
|                                       | R. medial frontal             | 0.75081082 | 0.4625  |
|                                       | L. precuneus                  | 0.37482484 | 0.3244  |
|                                       | R. precuneus                  | -0.0824114 | 0.8161  |
|                                       | L. medial temporal cortex     | -0.0482112 | 0.8239  |
|                                       | R. medial temporal cortex     | -0.2522661 | 0.3712  |
|                                       | L. posterior cingulate cortex | 0.69335937 | 0.0456* |
|                                       | R. posterior cingulate cortex | -0.5939853 | 0.0834  |
| <b>Memory disturbance</b>             | L. anterior horn PVWML        | 0.00016289 | 0.439   |
|                                       | R. anterior horn PVWML        | -0.00024   | 0.231   |
|                                       | L. posterior horn PVWML       | 0.00114035 | 0.0769  |
|                                       | R. posterior horn PVWML       | -0.0002294 | 0.6746  |
|                                       | L. frontal DWML               | 0.00013049 | 0.6734  |
|                                       | R. frontal DWML               | -9.152e-5  | 0.8097  |
|                                       | L. parieto-occipital DWML     | -1.1489e-5 | 0.9586  |
|                                       | R. parieto-occipital DWML     | -0.0002665 | 0.221   |
|                                       | L. superior frontal           | 0.89242124 | 0.2616  |
|                                       | R. superior frontal           | -0.6455645 | 0.4514  |
|                                       | L. middle frontal             | -1.3584654 | 0.0232* |
|                                       | R. middle frontal             | 0.33083971 | 0.5453  |
|                                       | L. medial frontal             | -1.1364977 | 0.2598  |
|                                       | R. medial frontal             | 1.94375446 | 0.0751  |
|                                       | L. precuneus                  | 0.21246599 | 0.6174  |
|                                       | R. precuneus                  | -0.3421685 | 0.3863  |
|                                       | L. medial temporal cortex     | 0.19761643 | 0.4058  |
|                                       | R. medial temporal cortex     | -0.1653275 | 0.5894  |
|                                       | L. posterior cingulate cortex | 0.33893861 | 0.3902  |
|                                       | R. posterior cingulate cortex | -0.3654343 | 0.327   |
| <b>Disorder of spatial perception</b> |                               |            |         |
|                                       | L. anterior horn PVWML        | 0.00049911 | 0.1146  |

|                               |            |         |
|-------------------------------|------------|---------|
| R. anterior horn PVWML        | -0.0006988 | 0.0329* |
| L. posterior horn PVWML       | -0.0009039 | 0.3891  |
| R. posterior horn PVWML       | 0.00087654 | 0.3112  |
| L. frontal DWML               | -0.0005233 | 0.2949  |
| R. frontal DWML               | 0.00087164 | 0.1707  |
| L. parieto-occipital DWML     | 0.0003555  | 0.3128  |
| R. parieto-occipital DWML     | -0.0002183 | 0.4967  |
| L. superior frontal           | -0.3580423 | 0.8354  |
| R. superior frontal           | -0.0755377 | 0.9602  |
| L. middle frontal             | -1.7902954 | 0.0963  |
| R. middle frontal             | 1.87557471 | 0.0490* |
| L. medial frontal             | 3.02259961 | 0.1328  |
| R. medial frontal             | -1.8966699 | 0.2607  |
| L. precuneus                  | -1.1513823 | 0.2126  |
| R. precuneus                  | -0.0512577 | 0.9506  |
| L. medial temporal cortex     | 0.31741918 | 0.4873  |
| R. medial temporal cortex     | -0.636336  | 0.2771  |
| L. posterior cingulate cortex | 1.34148984 | 0.0551  |
| R. posterior cingulate cortex | -0.5797976 | 0.4175  |

---

**Impairment of  
language skill**

|                           |            |        |
|---------------------------|------------|--------|
| L. anterior horn PVWML    | 0.00015812 | 0.6084 |
| R. anterior horn PVWML    | -7.4247e-5 | 0.795  |
| L. posterior horn PVWML   | 0.00091324 | 0.4043 |
| R. posterior horn PVWML   | -0.0008877 | 0.3143 |
| L. frontal DWML           | -3.8388e-5 | 0.9344 |
| R. frontal DWML           | -0.0004232 | 0.4265 |
| L. parieto-occipital DWML | -5.9538e-5 | 0.8685 |
| R. parieto-occipital DWML | 0.00024063 | 0.466  |
| L. superior frontal       | -1.4376762 | 0.3445 |
| R. superior frontal       | -2.2509765 | 0.1519 |
| L. middle frontal         | 0.81891396 | 0.4035 |
| R. middle frontal         | 0.66620494 | 0.4842 |
| L. medial frontal         | -0.5472886 | 0.7812 |
| R. medial frontal         | 1.8884173  | 0.3506 |
| L. precuneus              | -0.1006141 | 0.8952 |

|                               |            |        |
|-------------------------------|------------|--------|
| R. precuneus                  | 0.49601942 | 0.5123 |
| L. medial temporal cortex     | 0.3589806  | 0.4226 |
| R. medial temporal cortex     | 0.04545698 | 0.9347 |
| L. posterior cingulate cortex | 0.16648874 | 0.8079 |
| R. posterior cingulate cortex | -1.0539484 | 0.1444 |

---

L.: left; R.: right; PVWML: periventricular white matter lesion; DWML: deep white matter lesion.

**Supplemental Table 2.** Logistic regression analysis for rhGM and WML in subcategories of BPSD.

| Subcategories of BPSD | Affected lesions              | Estimated value of parameter | p      |
|-----------------------|-------------------------------|------------------------------|--------|
| <b>Hypoactivity</b>   | L. anterior horn PVWML        | 0.00013049                   | 0.5792 |
|                       | R. anterior horn PVWML        | -0.0001627                   | 0.4829 |
|                       | L. posterior horn PVWML       | -0.0007302                   | 0.3216 |
|                       | R. posterior horn PVWML       | 0.00021849                   | 0.7247 |
|                       | L. frontal DWML               | -0.0004739                   | 0.1949 |
|                       | R. frontal DWML               | 0.00075456                   | 0.1085 |
|                       | L. parieto-occipital DWML     | 0.00035364                   | 0.1919 |
|                       | R. parieto-occipital DWML     | -0.0001414                   | 0.5628 |
|                       | L. superior frontal           | 0.00274703                   | 0.9976 |
|                       | R. superior frontal           | 0.43532503                   | 0.6459 |
|                       | L. middle frontal             | -0.340769                    | 0.5719 |
|                       | R. middle frontal             | 0.32132826                   | 0.5942 |
|                       | L. medial frontal             | -0.5290616                   | 0.6352 |
|                       | R. medial frontal             | 0.40727337                   | 0.7307 |
|                       | L. precuneus                  | -0.219848                    | 0.6258 |
|                       | R. precuneus                  | 0.05318266                   | 0.8995 |
|                       | L. medial temporal cortex     | 0.13669309                   | 0.6036 |
|                       | R. medial temporal cortex     | -0.4460895                   | 0.2184 |
|                       | L. posterior cingulate cortex | 0.74020356                   | 0.094  |
|                       | R. posterior cingulate cortex | -0.678032                    | 0.0803 |
| <b>Hyperactivity</b>  | L. anterior horn PVWML        | 0.00032113                   | 0.2937 |
|                       | R. anterior horn PVWML        | -8.634e-5                    | 0.7434 |
|                       | L. posterior horn PVWML       | -0.0004951                   | 0.5805 |
|                       | R. posterior horn PVWML       | -0.0001193                   | 0.88   |
|                       | L. frontal DWML               | 0.00038192                   | 0.3532 |
|                       | R. frontal DWML               | -0.00072                     | 0.1425 |
|                       | L. parieto-occipital DWML     | -0.0001055                   | 0.7227 |

|                               |                               |            |         |
|-------------------------------|-------------------------------|------------|---------|
|                               | R. parieto-occipital DWML     | 0.00016169 | 0.5756  |
|                               | L. superior frontal           | 1.32581412 | 0.2756  |
|                               | R. superior frontal           | -1.2401227 | 0.3908  |
|                               | L. middle frontal             | 0.17633868 | 0.8146  |
|                               | R. middle frontal             | 0.44941357 | 0.5723  |
|                               | L. medial frontal             | -2.5940377 | 0.1013  |
|                               | R. medial frontal             | 0.76139942 | 0.6585  |
|                               | L. precuneus                  | -0.2331703 | 0.6824  |
|                               | R. precuneus                  | 0.73452328 | 0.2024  |
|                               | L. medial temporal cortex     | -0.0270732 | 0.9376  |
|                               | R. medial temporal cortex     | 0.02688862 | 0.9517  |
|                               | L. posterior cingulate cortex | 0.30291191 | 0.5667  |
|                               | R. posterior cingulate cortex | 0.13421046 | 0.7855  |
| <b>Hallucination/delusion</b> | L. anterior horn PVWML        | 7.65E-05   | 0.8223  |
|                               | R. anterior horn PVWML        | -0.0001746 | 0.5745  |
|                               | L. posterior horn PVWML       | 0.00023802 | 0.8252  |
|                               | R. posterior horn PVWML       | 0.00051725 | 0.5729  |
|                               | L. frontal DWML               | 0.00141247 | 0.0298* |
|                               | R. frontal DWML               | -0.0016071 | 0.0324* |
|                               | L. parieto-occipital DWML     | -8.648e-5  | 0.8139  |
|                               | R. parieto-occipital DWML     | 0.0000274  | 0.9396  |
|                               | L. superior frontal           | -0.8415228 | 0.5226  |
|                               | R. superior frontal           | 2.28379644 | 0.108   |
|                               | L. middle frontal             | 0.86765002 | 0.3351  |
|                               | R. middle frontal             | -0.1525485 | 0.8602  |
|                               | L. medial frontal             | 0.80280377 | 0.6102  |
|                               | R. medial frontal             | -1.9970691 | 0.203   |
|                               | L. precuneus                  | 0.56412973 | 0.4048  |
|                               | R. precuneus                  | -0.8307075 | 0.2148  |
|                               | L. medial temporal cortex     | -0.4825163 | 0.2684  |
|                               | R. medial temporal cortex     | -0.4576018 | 0.3866  |
|                               | L. posterior cingulate cortex | 0.36681488 | 0.5614  |
|                               | R. posterior cingulate cortex | -0.1089585 | 0.8585  |
| <b>Abnormal behavior</b>      | L. anterior horn PVWML        | 5.27E-05   | 0.9155  |

|                               |            |         |
|-------------------------------|------------|---------|
| R. anterior horn PVWML        | -0.0003001 | 0.5149  |
| L. posterior horn PVWML       | 0.00274921 | 0.1153  |
| R. posterior horn PVWML       | -0.0021141 | 0.0948  |
| L. frontal DWML               | -0.000707  | 0.2739  |
| R. frontal DWML               | 0.00154307 | 0.0817  |
| L. parieto-occipital DWML     | -0.0003441 | 0.5064  |
| R. parieto-occipital DWML     | -0.0002113 | 0.6154  |
| L. superior frontal           | -1.5106336 | 0.5241  |
| R. superior frontal           | -1.3194548 | 0.5471  |
| L. middle frontal             | -1.3677095 | 0.3836  |
| R. middle frontal             | -0.1747298 | 0.8851  |
| L. medial frontal             | 5.67414341 | 0.0461* |
| R. medial frontal             | -1.3943382 | 0.5661  |
| L. precuneus                  | -0.681001  | 0.5751  |
| R. precuneus                  | -0.239504  | 0.86    |
| L. medial temporal cortex     | 0.95776964 | 0.0962  |
| R. medial temporal cortex     | 1.06097187 | 0.1472  |
| L. posterior cingulate cortex | -1.3593349 | 0.2151  |
| R. posterior cingulate cortex | -0.021799  | 0.9786  |

---

BPSD: behavioral and psychological symptoms of dementia; L.: left; R.: right; PVWML: periventricular white matter lesion; DWML: deep white matter lesion.

**Supplemental Table 3.** Statistical data of Spearman's Rank correlation coefficient for the association between rhGM and WML in each symptom of subcategories of cognitive impairment and BPSD.

|                     |                        | Left    |         | Right   |         |
|---------------------|------------------------|---------|---------|---------|---------|
| rhGM                | WML                    | rs      | p       | rs      | p       |
| Disorientation      |                        |         |         |         |         |
| Superior frontal    | Anterior horn PVWML    | 0.0079  | 0.9339  | 0.01    | 0.9163  |
|                     | Posterior horn PVWML   | -0.0886 | 0.3484  | -0.0730 | 0.4403  |
|                     | Frontal DWML           | 0.053   | 0.5751  | 0.0376  | 0.6913  |
|                     | Parieto-occipital DWML | -0.0329 | 0.7278  | -0.0857 | 0.3647  |
| Middle frontal      | Anterior horn PVWML    | 0.0502  | 0.5958  | 0.0588  | 0.5346  |
|                     | Posterior horn PVWML   | -0.0862 | 0.3616  | -0.0381 | 0.687   |
|                     | Frontal DWML           | 0.089   | 0.3462  | 0.0846  | 0.371   |
|                     | Parieto-occipital DWML | -0.0574 | 0.5444  | -0.0836 | 0.3765  |
| Medial frontal      | Anterior horn PVWML    | 0.0003  | 0.9973  | -0.0151 | 0.8734  |
|                     | Posterior horn PVWML   | -0.1053 | 0.2648  | -0.1022 | 0.2794  |
|                     | Frontal DWML           | 0.0357  | 0.7063  | 0.0048  | 0.9599  |
|                     | Parieto-occipital DWML | -0.0376 | 0.6913  | -0.1228 | 0.1929  |
| Precuneus           | Anterior horn PVWML    | -0.1967 | 0.0360* | -0.1481 | 0.1157  |
|                     | Posterior horn PVWML   | -0.2060 | 0.0279* | -0.1502 | 0.1107  |
|                     | Frontal DWML           | -0.0942 | 0.3186  | -0.1612 | 0.0866  |
|                     | Parieto-occipital DWML | -0.1333 | 0.1574  | -0.1993 | 0.0336* |
| Medial temporal     | Anterior horn PVWML    | 0.0463  | 0.6244  | 0.1129  | 0.2319  |
|                     | Posterior horn PVWML   | -0.0309 | 0.7444  | -0.0032 | 0.973   |
|                     | Frontal DWML           | 0.1063  | 0.2601  | 0.1264  | 0.1803  |
|                     | Parieto-occipital DWML | 0.0413  | 0.6627  | -0.0160 | 0.8656  |
| PCC                 | Anterior horn PVWML    | -0.0768 | 0.417   | -0.0297 | 0.7538  |
|                     | Posterior horn PVWML   | -0.0862 | 0.362   | 0.0295  | 0.7555  |
|                     | Frontal DWML           | -0.0400 | 0.6726  | 0.0118  | 0.9012  |
|                     | Parieto-occipital DWML | -0.1214 | 0.1981  | -0.0517 | 0.5848  |
| Disturbed attention |                        |         |         |         |         |
| Superior frontal    | Anterior horn PVWML    | -0.0265 | 0.7665  | -0.0197 | 0.8253  |
|                     | Posterior horn PVWML   | -0.1350 | 0.1286  | -0.1367 | 0.1238  |



|                           |                        |         |         |         |         |
|---------------------------|------------------------|---------|---------|---------|---------|
| Middle frontal            | Frontal DWML           | 0.0082  | 0.9264  | 0.0011  | 0.9898  |
|                           | Parieto-occipital DWML | -0.0945 | 0.2886  | -0.1356 | 0.127   |
|                           | Anterior horn PVWML    | 0.0244  | 0.7842  | 0.0349  | 0.6954  |
|                           | Posterior horn PVWML   | -0.1274 | 0.1517  | -0.0961 | 0.2806  |
| Medial frontal            | Frontal DWML           | 0.0345  | 0.6987  | 0.0481  | 0.5895  |
|                           | Parieto-occipital DWML | -0.1086 | 0.2223  | -0.1168 | 0.1893  |
|                           | Anterior horn PVWML    | -0.0381 | 0.6695  | -0.0328 | 0.7134  |
|                           | Posterior horn PVWML   | -0.1433 | 0.1065  | -0.1456 | 0.1009  |
| Precuneus                 | Frontal DWML           | -0.0106 | 0.9053  | -0.0159 | 0.8589  |
|                           | Parieto-occipital DWML | -0.1006 | 0.2585  | -0.1495 | 0.0921  |
|                           | Anterior horn PVWML    | -0.2349 | 0.0076* | -0.1713 | 0.0532  |
|                           | Posterior horn PVWML   | -0.2191 | 0.0129* | -0.1612 | 0.0691  |
| Medial temporal           | Frontal DWML           | -0.1912 | 0.0306* | -0.2221 | 0.0117* |
|                           | Parieto-occipital DWML | -0.2199 | 0.0126* | -0.2129 | 0.0158* |
|                           | Anterior horn PVWML    | 0.0423  | 0.6354  | 0.1549  | 0.0808  |
|                           | Posterior horn PVWML   | -0.0644 | 0.4699  | 0.0393  | 0.6599  |
| PCC                       | Frontal DWML           | 0.063   | 0.48    | 0.1323  | 0.1365  |
|                           | Parieto-occipital DWML | -0.0020 | 0.9819  | 0.021   | 0.8142  |
|                           | Anterior horn PVWML    | -0.0198 | 0.8247  | 0.0333  | 0.7091  |
|                           | Posterior horn PVWML   | -0.0445 | 0.618   | 0.0283  | 0.7512  |
|                           | Frontal DWML           | -0.0358 | 0.6881  | 0.0365  | 0.6826  |
|                           | Parieto-occipital DWML | -0.1141 | 0.1996  | -0.0508 | 0.5691  |
| <b>Memory disturbance</b> |                        |         |         |         |         |
| Superior frontal          | Anterior horn PVWML    | 0.0188  | 0.8284  | -0.0044 | 0.959   |
|                           | Posterior horn PVWML   | -0.1103 | 0.2011  | -0.1143 | 0.1851  |
| Middle frontal            | Frontal DWML           | 0.0684  | 0.4285  | 0.0755  | 0.3824  |
|                           | Parieto-occipital DWML | -0.0461 | 0.5941  | -0.0822 | 0.3413  |
|                           | Anterior horn PVWML    | 0.0354  | 0.6825  | 0.0352  | 0.6842  |
|                           | Posterior horn PVWML   | -0.1415 | 0.1004  | -0.0818 | 0.3436  |
| Medial frontal            | Frontal DWML           | 0.0647  | 0.4542  | 0.0982  | 0.2553  |
|                           | Parieto-occipital DWML | -0.0990 | 0.2516  | -0.0868 | 0.3148  |
|                           | Anterior horn PVWML    | 0.0194  | 0.8225  | -0.0133 | 0.8782  |
|                           | Posterior horn PVWML   | -0.1218 | 0.1578  | -0.1305 | 0.1301  |
|                           | Frontal DWML           | 0.0588  | 0.4964  | 0.0445  | 0.6068  |

|                                       |                        |         |         |         |         |
|---------------------------------------|------------------------|---------|---------|---------|---------|
| Precuneus                             | Parieto-occipital DWML | -0.0576 | 0.5053  | -0.1182 | 0.1706  |
|                                       | Anterior horn PVWML    | -0.1893 | 0.0273* | -0.1725 | 0.0446* |
|                                       | Posterior horn PVWML   | -0.1762 | 0.0401* | -0.1317 | 0.1263  |
|                                       | Frontal DWML           | -0.1013 | 0.2405  | -0.1393 | 0.1058  |
| Medial temporal                       | Parieto-occipital DWML | -0.1424 | 0.0981  | -0.1655 | 0.0542  |
|                                       | Anterior horn PVWML    | 0.053   | 0.5396  | 0.1412  | 0.101   |
|                                       | Posterior horn PVWML   | -0.0445 | 0.6069  | 0.0359  | 0.6783  |
|                                       | Frontal DWML           | 0.114   | 0.1863  | 0.1756  | 0.0409* |
| PCC                                   | Parieto-occipital DWML | 0.0263  | 0.7616  | 0.027   | 0.755   |
|                                       | Anterior horn PVWML    | -0.0396 | 0.6474  | 0.0629  | 0.4666  |
|                                       | Posterior horn PVWML   | -0.0708 | 0.4127  | 0.0417  | 0.6298  |
|                                       | Frontal DWML           | 0.0022  | 0.9799  | 0.1231  | 0.1535  |
|                                       | Parieto-occipital DWML | -0.1060 | 0.2194  | -0.0102 | 0.9058  |
| <b>Disorder of spatial perception</b> |                        |         |         |         |         |
| Superior frontal                      | Anterior horn PVWML    | 0.0702  | 0.7279  | 0.1713  | 0.393   |
|                                       | Posterior horn PVWML   | -0.1838 | 0.3589  | -0.1880 | 0.3476  |
|                                       | Frontal DWML           | 0.0397  | 0.844   | 0.1098  | 0.5858  |
|                                       | Parieto-occipital DWML | -0.0085 | 0.9663  | 0.0824  | 0.6828  |
| Middle frontal                        | Anterior horn PVWML    | -0.0043 | 0.9831  | 0.1929  | 0.3349  |
|                                       | Posterior horn PVWML   | -0.2063 | 0.3018  | -0.1258 | 0.5319  |
|                                       | Frontal DWML           | -0.0367 | 0.8558  | 0.1602  | 0.4248  |
|                                       | Parieto-occipital DWML | -0.0324 | 0.8727  | 0.0812  | 0.6872  |
| Medial frontal                        | Anterior horn PVWML    | 0.0391  | 0.8466  | 0.1075  | 0.5937  |
|                                       | Posterior horn PVWML   | -0.1935 | 0.3334  | -0.3199 | 0.1038  |
|                                       | Frontal DWML           | 0.0043  | 0.9831  | 0.0141  | 0.9445  |
|                                       | Parieto-occipital DWML | -0.0128 | 0.9494  | -0.0501 | 0.8042  |
| Precuneus                             | Anterior horn PVWML    | -0.4231 | 0.0279* | -0.2162 | 0.2789  |
|                                       | Posterior horn PVWML   | -0.2918 | 0.1397  | -0.2821 | 0.1541  |
|                                       | Frontal DWML           | -0.2293 | 0.25    | -0.2284 | 0.2519  |
|                                       | Parieto-occipital DWML | -0.1630 | 0.4166  | -0.1032 | 0.6086  |
| Medial temporal                       | Anterior horn PVWML    | -0.1233 | 0.5399  | 0.152   | 0.449   |
|                                       | Posterior horn PVWML   | -0.2409 | 0.2261  | -0.1856 | 0.354   |
|                                       | Frontal DWML           | -0.0590 | 0.77    | 0.0752  | 0.7093  |
|                                       | Parieto-occipital DWML | -0.0540 | 0.7889  | 0.0769  | 0.7029  |

|                                     |                        |         |        |         |         |
|-------------------------------------|------------------------|---------|--------|---------|---------|
| PCC                                 | Anterior horn PVWML    | -0.1001 | 0.6193 | -0.0110 | 0.9566  |
|                                     | Posterior horn PVWML   | -0.2155 | 0.2803 | -0.2405 | 0.2268  |
|                                     | Frontal DWML           | -0.1098 | 0.5858 | -0.0997 | 0.6209  |
|                                     | Parieto-occipital DWML | -0.1667 | 0.406  | -0.1465 | 0.4658  |
| <b>Impairment of language skill</b> |                        |         |        |         |         |
| Superior frontal                    | Anterior horn PVWML    | -0.0530 | 0.8056 | 0.0435  | 0.8401  |
|                                     | Posterior horn PVWML   | 0.02    | 0.9261 | 0.0339  | 0.875   |
|                                     | Frontal DWML           | 0.0431  | 0.8414 | 0.1654  | 0.44    |
|                                     | Parieto-occipital DWML | -0.0400 | 0.8528 | -0.0765 | 0.7223  |
| Middle frontal                      | Anterior horn PVWML    | -0.0052 | 0.9807 | 0.1087  | 0.6132  |
|                                     | Posterior horn PVWML   | -0.0383 | 0.8591 | 0.0922  | 0.6684  |
|                                     | Frontal DWML           | 0.0662  | 0.7585 | 0.2097  | 0.3253  |
|                                     | Parieto-occipital DWML | -0.0922 | 0.6684 | -0.0122 | 0.955   |
| Medial frontal                      | Anterior horn PVWML    | -0.0070 | 0.9743 | 0.1035  | 0.6304  |
|                                     | Posterior horn PVWML   | -0.0130 | 0.9518 | 0.0739  | 0.7314  |
|                                     | Frontal DWML           | 0.068   | 0.7523 | 0.2463  | 0.246   |
|                                     | Parieto-occipital DWML | -0.0609 | 0.7775 | -0.0191 | 0.9293  |
| Precuneus                           | Anterior horn PVWML    | -0.2800 | 0.1851 | -0.2391 | 0.2604  |
|                                     | Posterior horn PVWML   | -0.1096 | 0.6103 | -0.1896 | 0.375   |
|                                     | Frontal DWML           | -0.1983 | 0.3531 | -0.1984 | 0.3526  |
|                                     | Parieto-occipital DWML | -0.2061 | 0.334  | -0.3400 | 0.104   |
| Medial temporal                     | Anterior horn PVWML    | 0.2217  | 0.2977 | 0.4165  | 0.0429* |
|                                     | Posterior horn PVWML   | 0.1539  | 0.4727 | 0.3078  | 0.1434  |
|                                     | Frontal DWML           | 0.1743  | 0.4153 | 0.3246  | 0.1217  |
|                                     | Parieto-occipital DWML | 0.1183  | 0.5821 | 0.1878  | 0.3795  |
| PCC                                 | Anterior horn PVWML    | -0.1635 | 0.4453 | 0.1374  | 0.522   |
|                                     | Posterior horn PVWML   | -0.2783 | 0.188  | 0.04    | 0.8528  |
|                                     | Frontal DWML           | -0.2192 | 0.3035 | 0.1158  | 0.5902  |
|                                     | Parieto-occipital DWML | -0.3939 | 0.0568 | -0.0217 | 0.9197  |

rhGM: regional hypoperfusion of gray matter; PVWML: periventricular white matter lesion; DWML: deep white matter lesion; PCC: posterior cingulate cortex.

**Supplemental Table 4.** Statistical data of Spearman's Rank correlation coefficient for the connectivity between rhGM and WML in each symptom of subcategories of cognitive impairment in AD type dementia and aMCI.

| rhGM             | WML                    | AD type |        |         |        | aMCI    |        |         |        |
|------------------|------------------------|---------|--------|---------|--------|---------|--------|---------|--------|
|                  |                        | Left    |        | Right   |        | Left    |        | Right   |        |
|                  |                        | rs      | p      | rs      | p      | rs      | p      | rs      | p      |
| Disorientation   |                        |         |        |         |        |         |        |         |        |
| Superior frontal | Anterior horn PVWML    | 0.0251  | 0.8195 | 0.0299  | 0.7859 | -0.0394 | 0.8392 | -0.0951 | 0.6237 |
|                  | Posterior horn PVWML   | -0.0865 | 0.4314 | -0.0586 | 0.594  | -0.1424 | 0.4613 | -0.1453 | 0.452  |
|                  | Frontal DWML           | 0.0553  | 0.6151 | 0.0327  | 0.7666 | 0.0315  | 0.871  | 0.0022  | 0.9909 |
|                  | Parieto-occipital DWML | -0.0248 | 0.8215 | -0.0299 | 0.7858 | -0.0345 | 0.8591 | -0.2417 | 0.2066 |
|                  |                        |         |        |         |        |         |        |         |        |
| Middle frontal   | Anterior horn PVWML    | 0.0277  | 0.8014 | 0.0467  | 0.6712 | 0.0586  | 0.7626 | 0.065   | 0.7375 |
|                  | Posterior horn PVWML   | -0.1135 | 0.3008 | -0.0247 | 0.8224 | -0.0621 | 0.7491 | -0.0143 | 0.9414 |
|                  | Frontal DWML           | 0.0496  | 0.6523 | 0.0403  | 0.7145 | 0.1527  | 0.429  | 0.2026  | 0.2919 |
|                  | Parieto-occipital DWML | -0.0649 | 0.5549 | -0.0686 | 0.5329 | -0.0281 | 0.885  | -0.0926 | 0.6327 |
|                  |                        |         |        |         |        |         |        |         |        |
| Medial frontal   | Anterior horn PVWML    | -0.0049 | 0.9645 | -0.0352 | 0.7493 | -0.0414 | 0.8312 | -0.0266 | 0.8911 |
|                  | Posterior horn PVWML   | -0.1239 | 0.2586 | -0.1229 | 0.2623 | -0.1384 | 0.4739 | -0.0714 | 0.7127 |
|                  | Frontal DWML           | 0.0138  | 0.9001 | -0.0423 | 0.7004 | 0.0318  | 0.87   | 0.0918  | 0.6359 |
|                  | Parieto-occipital DWML | -0.0518 | 0.6376 | -0.1242 | 0.2575 | -0.0404 | 0.8352 | -0.1579 | 0.4133 |
|                  |                        |         |        |         |        |         |        |         |        |
| Precuneus        | Anterior horn PVWML    | -0.1384 | 0.2066 | -0.1107 | 0.313  | -0.3458 | 0.0661 | -0.2911 | 0.1255 |
|                  | Posterior horn PVWML   | -0.1759 | 0.1073 | -0.1262 | 0.2498 | -0.3409 | 0.0704 | -0.2882 | 0.1295 |
|                  | Frontal DWML           | -0.0149 | 0.8922 | -0.1453 | 0.1845 | -0.2722 | 0.1531 | -0.2469 | 0.1967 |
|                  |                        |         |        |         |        |         |        |         |        |

|                            |                        |         |        |         |        |         |        |         |         |
|----------------------------|------------------------|---------|--------|---------|--------|---------|--------|---------|---------|
| Medial temporal            | Parieto-occipital DWML | -0.0573 | 0.6027 | -0.1204 | 0.2723 | -0.3079 | 0.1042 | -0.4924 | 0.0067* |
|                            | Anterior horn PVWML    | -0.0037 | 0.9734 | 0.1112  | 0.3109 | 0.1768  | 0.3588 | 0.1414  | 0.4644  |
|                            | Posterior horn PVWML   | -0.0225 | 0.838  | 0.0574  | 0.6017 | -0.0690 | 0.7222 | -0.0847 | 0.6621  |
|                            | Frontal DWML           | 0.0343  | 0.7554 | 0.09    | 0.4127 | 0.318   | 0.0927 | 0.2751  | 0.1487  |
|                            | Parieto-occipital DWML | 0.0605  | 0.5824 | 0.0419  | 0.7034 | 0.0049  | 0.9798 | -0.1175 | 0.5438  |
| PCC                        | Anterior horn PVWML    | -0.1066 | 0.3314 | -0.0758 | 0.4907 | -0.0369 | 0.8491 | 0.0847  | 0.6621  |
|                            | Posterior horn PVWML   | -0.0826 | 0.4525 | 0.0059  | 0.9573 | -0.1906 | 0.3219 | 0.1094  | 0.5723  |
|                            | Frontal DWML           | -0.0719 | 0.5133 | -0.0768 | 0.4847 | 0.0325  | 0.867  | 0.2209  | 0.2495  |
|                            | Parieto-occipital DWML | -0.1004 | 0.3603 | -0.0487 | 0.6577 | -0.1734 | 0.3684 | -0.0943 | 0.6264  |
| <b>Disturbed attention</b> |                        |         |        |         |        |         |        |         |         |
| Superior frontal           | Anterior horn PVWML    | -0.0084 | 0.9383 | -0.0008 | 0.9943 | -0.0695 | 0.6658 | -0.1213 | 0.4498  |
|                            | Posterior horn PVWML   | -0.1254 | 0.2471 | -0.0905 | 0.4047 | -0.2392 | 0.132  | -0.2732 | 0.084   |
|                            | Frontal DWML           | 0.0112  | 0.9177 | -0.0235 | 0.829  | -0.0464 | 0.7735 | -0.0318 | 0.8436  |
|                            | Parieto-occipital DWML | -0.0617 | 0.5705 | -0.0576 | 0.5964 | -0.1918 | 0.2296 | -0.3238 | 0.0389* |
| Middle frontal             | Anterior horn PVWML    | 0.0238  | 0.827  | 0.02    | 0.854  | 0.0152  | 0.9251 | 0.0114  | 0.9435  |
|                            | Posterior horn PVWML   | -0.1415 | 0.1912 | -0.0794 | 0.4648 | -0.1510 | 0.3458 | -0.1303 | 0.4167  |
|                            | Frontal DWML           | 0.0216  | 0.8423 | -0.0164 | 0.8798 | 0.0067  | 0.9668 | 0.107   | 0.5056  |
|                            | Parieto-occipital DWML | -0.0892 | 0.4113 | -0.0894 | 0.4101 | -0.1747 | 0.2745 | -0.1851 | 0.2466  |
| Medial frontal             | Anterior horn PVWML    | -0.0256 | 0.8139 | -0.0557 | 0.6086 | -0.1026 | 0.5232 | -0.0620 | 0.7001  |

|                           |                        |         |         |         |         |         |         |         |         |
|---------------------------|------------------------|---------|---------|---------|---------|---------|---------|---------|---------|
|                           | Posterior horn PVWML   | -0.1316 | 0.2243  | -0.1406 | 0.1939  | -0.2674 | 0.091   | -0.2148 | 0.1774  |
|                           | Frontal DWML           | -0.0100 | 0.9264  | -0.0781 | 0.472   | -0.0998 | 0.5348  | -0.0021 | 0.9896  |
|                           | Parieto-occipital DWML | -0.0679 | 0.5318  | -0.1205 | 0.2663  | -0.2420 | 0.1274  | -0.2721 | 0.0853  |
|                           | Anterior horn PVWML    | -0.2136 | 0.0469* | -0.1940 | 0.0718  | -0.2805 | 0.0757  | -0.1621 | 0.3112  |
| Precuneus                 | Posterior horn PVWML   | -0.2179 | 0.0427* | -0.1618 | 0.1343  | -0.2843 | 0.0716  | -0.2169 | 0.1731  |
|                           | Frontal DWML           | -0.1136 | 0.2948  | -0.2192 | 0.0414* | -0.3711 | 0.0169* | -0.3230 | 0.0394* |
|                           | Parieto-occipital DWML | -0.1069 | 0.3242  | -0.1213 | 0.2632  | -0.4870 | 0.0012* | -0.4546 | 0.0028* |
| Medial temporal           | Anterior horn PVWML    | -0.0040 | 0.9705  | 0.1124  | 0.3     | 0.1085  | 0.4997  | 0.1827  | 0.253   |
|                           | Posterior horn PVWML   | -0.0238 | 0.8266  | 0.0368  | 0.7349  | -0.1928 | 0.2272  | 0.0334  | 0.8359  |
|                           | Frontal DWML           | 0.0139  | 0.898   | 0.0634  | 0.5598  | 0.1116  | 0.4871  | 0.1727  | 0.2803  |
|                           | Parieto-occipital DWML | 0.0578  | 0.5946  | 0.0411  | 0.7051  | -0.1662 | 0.299   | -0.0576 | 0.7204  |
| PCC                       | Anterior horn PVWML    | -0.0292 | 0.7884  | -0.0059 | 0.9564  | -0.0249 | 0.8771  | 0.0392  | 0.8077  |
|                           | Posterior horn PVWML   | -0.0542 | 0.6178  | 0.0204  | 0.8514  | -0.0904 | 0.574   | -0.0124 | 0.9388  |
|                           | Frontal DWML           | -0.0390 | 0.7198  | -0.0423 | 0.6972  | -0.0449 | 0.7805  | 0.086   | 0.5928  |
|                           | Parieto-occipital DWML | -0.0631 | 0.5615  | -0.0185 | 0.8652  | -0.2437 | 0.1246  | -0.1917 | 0.2298  |
| <b>Memory disturbance</b> |                        |         |         |         |         |         |         |         |         |
| Superior frontal          | Anterior horn PVWML    | 0.004   | 0.9694  | -0.0099 | 0.9252  | 0.0894  | 0.5686  | -0.0187 | 0.9051  |
|                           | Posterior horn PVWML   | -0.1324 | 0.2057  | -0.1056 | 0.3136  | -0.0811 | 0.6052  | -0.1558 | 0.3183  |
|                           | Frontal DWML           | 0.0485  | 0.6441  | 0.0357  | 0.7341  | 0.1275  | 0.4153  | 0.109   | 0.4864  |

|                 |                        |         |        |         |        |         |        |         |         |
|-----------------|------------------------|---------|--------|---------|--------|---------|--------|---------|---------|
| Middle frontal  | Parieto-occipital DWML | -0.0660 | 0.5298 | -0.0406 | 0.6992 | 0.0145  | 0.9265 | -0.1855 | 0.2336  |
|                 | Anterior horn PVWML    | 0.0157  | 0.8815 | 0.0277  | 0.7923 | 0.0951  | 0.5439 | 0.0523  | 0.7393  |
|                 | Posterior horn PVWML   | -0.1754 | 0.0926 | -0.0708 | 0.4999 | -0.0905 | 0.564  | -0.0796 | 0.612   |
|                 | Frontal DWML           | 0.0351  | 0.7381 | 0.0519  | 0.6211 | 0.1237  | 0.4294 | 0.1707  | 0.2737  |
| Medial frontal  | Parieto-occipital DWML | -0.1236 | 0.2378 | -0.0659 | 0.5302 | -0.0497 | 0.7517 | -0.1198 | 0.4443  |
|                 | Anterior horn PVWML    | -0.0091 | 0.9311 | -0.0576 | 0.5835 | 0.0885  | 0.5726 | 0.0329  | 0.834   |
|                 | Posterior horn PVWML   | -0.1569 | 0.1331 | -0.1546 | 0.139  | -0.0741 | 0.6365 | -0.1102 | 0.4816  |
|                 | Frontal DWML           | 0.0183  | 0.8617 | -0.0274 | 0.7945 | 0.1278  | 0.4142 | 0.1274  | 0.4155  |
| Precuneus       | Parieto-occipital DWML | -0.0876 | 0.4035 | -0.1208 | 0.2488 | -0.0036 | 0.9816 | -0.1454 | 0.3521  |
|                 | Anterior horn PVWML    | -0.1655 | 0.1129 | -0.1522 | 0.1452 | -0.2152 | 0.1658 | -0.2481 | 0.1087  |
|                 | Posterior horn PVWML   | -0.1672 | 0.1091 | -0.1122 | 0.2843 | -0.2064 | 0.1841 | -0.2256 | 0.1458  |
|                 | Frontal DWML           | -0.0239 | 0.8204 | -0.1233 | 0.239  | -0.2260 | 0.1451 | -0.2272 | 0.1429  |
| Medial temporal | Parieto-occipital DWML | -0.0599 | 0.5687 | -0.0741 | 0.4802 | -0.2912 | 0.0582 | -0.4036 | 0.0073* |
|                 | Anterior horn PVWML    | -0.0235 | 0.8234 | 0.1101  | 0.2934 | 0.1868  | 0.2303 | 0.1982  | 0.2026  |
|                 | Posterior horn PVWML   | -0.0339 | 0.7469 | 0.0338  | 0.7479 | -0.1041 | 0.5067 | 0.0686  | 0.6622  |
|                 | Frontal DWML           | 0.0335  | 0.7501 | 0.1225  | 0.2421 | 0.2507  | 0.1049 | 0.2731  | 0.0764  |
| PCC             | Parieto-occipital DWML | 0.0314  | 0.7649 | 0.0505  | 0.6305 | -0.0116 | 0.9414 | -0.0055 | 0.9722  |
|                 | Anterior horn PVWML    | -0.0675 | 0.52   | -0.0180 | 0.8637 | -0.0040 | 0.9797 | 0.1732  | 0.2667  |

|                                       |                               |         |        |         |        |         |         |         |        |
|---------------------------------------|-------------------------------|---------|--------|---------|--------|---------|---------|---------|--------|
|                                       | Posterior horn<br>PVWML       | -0.0864 | 0.4101 | 0.0105  | 0.9204 | -0.0893 | 0.5693  | 0.0856  | 0.5851 |
|                                       | Frontal DWML                  | -0.0265 | 0.8012 | 0.0143  | 0.8916 | 0.0599  | 0.7029  | 0.2797  | 0.0693 |
|                                       | Parieto-<br>occipital<br>DWML | -0.1016 | 0.3323 | -0.0003 | 0.9978 | -0.1369 | 0.3814  | -0.0873 | 0.5778 |
| <b>Disorder of spatial perception</b> |                               |         |        |         |        |         |         |         |        |
| Superior<br>frontal                   | Anterior horn<br>PVWML        | 0.0909  | 0.6951 | 0.0805  | 0.7286 | 0.0857  | 0.8717  | -0.0290 | 0.9565 |
|                                       | Posterior horn<br>PVWML       | -0.1610 | 0.4856 | -0.1584 | 0.4927 | -0.7714 | 0.0724  | -0.3143 | 0.5441 |
|                                       | Frontal DWML                  | 0.0371  | 0.873  | 0.0806  | 0.7283 | -0.5429 | 0.2657  | -0.5429 | 0.2657 |
|                                       | Parieto-<br>occipital<br>DWML | -0.0078 | 0.9733 | 0.113   | 0.6258 | -0.8857 | 0.0188* | -0.7714 | 0.0724 |
| Middle frontal                        | Anterior horn<br>PVWML        | 0.1117  | 0.6298 | 0.1143  | 0.6218 | -0.2571 | 0.6228  | -0.2609 | 0.6175 |
|                                       | Posterior horn<br>PVWML       | -0.1844 | 0.4236 | -0.1039 | 0.654  | 0.1429  | 0.7872  | -0.1429 | 0.7872 |
|                                       | Frontal DWML                  | 0.0241  | 0.9174 | 0.156   | 0.4994 | -0.4286 | 0.3965  | -0.7143 | 0.1108 |
|                                       | Parieto-<br>occipital<br>DWML | -0.0195 | 0.9332 | 0.1078  | 0.6419 | -0.0857 | 0.8717  | -0.7714 | 0.0724 |
| Medial frontal                        | Anterior horn<br>PVWML        | 0.0675  | 0.7712 | -0.0312 | 0.8933 | 0.1429  | 0.7872  | 0.1449  | 0.7841 |
|                                       | Posterior horn<br>PVWML       | -0.2260 | 0.3246 | -0.3338 | 0.1392 | -0.6000 | 0.208   | -0.5429 | 0.2657 |
|                                       | Frontal DWML                  | -0.0235 | 0.9196 | -0.0949 | 0.6823 | -0.6571 | 0.1562  | -0.3143 | 0.5441 |
|                                       | Parieto-<br>occipital<br>DWML | -0.0883 | 0.7035 | -0.1013 | 0.6622 | -0.7714 | 0.0724  | -0.7143 | 0.1108 |
| Precuneus                             | Anterior horn<br>PVWML        | -0.4260 | 0.0542 | -0.3052 | 0.1785 | -0.4286 | 0.3965  | 0.1449  | 0.7841 |
|                                       | Posterior horn<br>PVWML       | -0.4234 | 0.0558 | -0.2455 | 0.2835 | -0.3714 | 0.4685  | -0.5429 | 0.2657 |
|                                       | Frontal DWML                  | -0.3029 | 0.1819 | -0.2120 | 0.3563 | -0.0857 | 0.8717  | -0.3143 | 0.5441 |



|                                     |                        |         |        |         |        |         |         |         |         |
|-------------------------------------|------------------------|---------|--------|---------|--------|---------|---------|---------|---------|
| Medial temporal                     | Parieto-occipital DWML | -0.2416 | 0.2915 | -0.0532 | 0.8187 | -0.4286 | 0.3965  | -0.7143 | 0.1108  |
|                                     | Anterior horn PVWML    | -0.2208 | 0.3362 | 0.0922  | 0.691  | 0.2609  | 0.6175  | 0.2319  | 0.6584  |
|                                     | Posterior horn PVWML   | -0.1857 | 0.4203 | -0.1974 | 0.3911 | -0.8117 | 0.0499* | -0.0857 | 0.8717  |
|                                     | Frontal DWML           | -0.0580 | 0.8029 | 0.0871  | 0.7073 | -0.5508 | 0.2574  | -0.2571 | 0.6228  |
|                                     | Parieto-occipital DWML | -0.0026 | 0.9911 | 0.0974  | 0.6745 | -0.8986 | 0.0149* | -0.2571 | 0.6228  |
| PCC                                 | Anterior horn PVWML    | -0.1247 | 0.5903 | -0.1013 | 0.6622 | 0.2571  | 0.6228  | -0.2319 | 0.6584  |
|                                     | Posterior horn PVWML   | -0.2883 | 0.205  | -0.2545 | 0.2655 | 0.1429  | 0.7872  | -0.1429 | 0.7872  |
|                                     | Frontal DWML           | -0.0945 | 0.6838 | -0.1665 | 0.4708 | -0.4857 | 0.3287  | -0.5429 | 0.2657  |
|                                     | Parieto-occipital DWML | -0.2948 | 0.1945 | -0.1753 | 0.4472 | -0.0286 | 0.9572  | -0.8857 | 0.0188* |
| <b>Impairment of language skill</b> |                        |         |        |         |        |         |         |         |         |
| Superior frontal                    | Anterior horn PVWML    | -0.1123 | 0.6472 | -0.0632 | 0.7973 | 0.7     | 0.1881  | 1       | <.0001* |
|                                     | Posterior horn PVWML   | -0.0491 | 0.8417 | 0.0439  | 0.8585 | 0.7     | 0.1881  | 0.6     | 0.2848  |
|                                     | Frontal DWML           | 0.0193  | 0.9374 | 0.115   | 0.6393 | 0.9     | 0.0374* | 0.9     | 0.0374* |
|                                     | Parieto-occipital DWML | -0.0509 | 0.8361 | -0.0649 | 0.7918 | 0.4     | 0.5046  | 0.7     | 0.1881  |
| Middle frontal                      | Anterior horn PVWML    | -0.0632 | 0.7973 | 0.0193  | 0.9375 | 0.7     | 0.1881  | 0.9     | 0.0374* |
|                                     | Posterior horn PVWML   | -0.0860 | 0.7264 | 0.1211  | 0.6215 | 0.7     | 0.1881  | 0.7     | 0.1881  |
|                                     | Frontal DWML           | 0.0123  | 0.9601 | 0.1632  | 0.5043 | 0.9     | 0.0374* | 1       | <.0001* |
|                                     | Parieto-occipital DWML | -0.1123 | 0.6472 | 0.0246  | 0.9205 | 0.4     | 0.5046  | 0.9     | 0.0374* |
| Medial frontal                      | Anterior horn PVWML    | -0.1193 | 0.6266 | -0.0404 | 0.8697 | 0.7     | 0.1881  | 1       | <.0001* |

|                 |                        |         |        |         |        |         |         |         |         |
|-----------------|------------------------|---------|--------|---------|--------|---------|---------|---------|---------|
| Precuneus       | Posterior horn PVWML   | -0.0754 | 0.7589 | 0.0807  | 0.7426 | 0.7     | 0.1881  | 0.6     | 0.2848  |
|                 | Frontal DWML           | -0.0404 | 0.8695 | 0.1764  | 0.4701 | 0.9     | 0.0374* | 0.9     | 0.0374* |
|                 | Parieto-occipital DWML | -0.1018 | 0.6785 | -0.0526 | 0.8306 | 0.4     | 0.5046  | 0.7     | 0.1881  |
|                 | Anterior horn PVWML    | -0.2070 | 0.3951 | -0.2316 | 0.3401 | -0.7000 | 0.1881  | -0.6000 | 0.2848  |
| Medial temporal | Posterior horn PVWML   | -0.0842 | 0.7318 | -0.1368 | 0.5764 | -0.2000 | 0.7471  | -0.2000 | 0.7471  |
|                 | Frontal DWML           | -0.0703 | 0.7749 | -0.1659 | 0.4974 | -0.6000 | 0.2848  | -0.7000 | 0.1881  |
|                 | Parieto-occipital DWML | -0.1158 | 0.6369 | -0.2333 | 0.3364 | -0.1000 | 0.8729  | -0.5000 | 0.391   |
|                 | Anterior horn PVWML    | 0.0912  | 0.7103 | 0.3158  | 0.1878 | 0.9     | 0.0374* | 1       | <.0001* |
| PCC             | Posterior horn PVWML   | 0.0895  | 0.7157 | 0.3158  | 0.1878 | 0.6     | 0.2848  | 0.6     | 0.2848  |
|                 | Frontal DWML           | -0.0105 | 0.9658 | 0.1913  | 0.4327 | 1       | <.0001* | 0.9     | 0.0374* |
|                 | Parieto-occipital DWML | 0.0807  | 0.7426 | 0.1228  | 0.6165 | 0.3     | 0.6238  | 0.7     | 0.1881  |
|                 | Anterior horn PVWML    | -0.1930 | 0.4286 | -0.0596 | 0.8083 | 0.1     | 0.8729  | 0.9     | 0.0374* |
|                 | Posterior horn PVWML   | -0.2719 | 0.2601 | -0.0702 | 0.7753 | -0.1000 | 0.8729  | 0.7     | 0.1881  |
|                 | Frontal DWML           | -0.2794 | 0.2466 | -0.1176 | 0.6316 | 0.3     | 0.6238  | 1       | <.0001* |
|                 | Parieto-occipital DWML | -0.3930 | 0.096  | -0.1982 | 0.4159 | -0.5000 | 0.391   | 0.9     | 0.0374* |

rhGM: regional hypoperfusion of gray matter; PVWML: periventricular white matter

lesion; DWML: deep white matter lesion; PCC: posterior cingulate cortex.

Supplemental Table 5. Statistical data of Spearman's Rank correlation coefficient for the connectivity between rhGM and WML in each symptom of subcategories of BPSD.

|                  |                        | Left    |         | Right   |         |
|------------------|------------------------|---------|---------|---------|---------|
| rhGM             | WML                    | rs      | p       | rs      | p       |
| Hypoactivity     |                        |         |         |         |         |
| Superior frontal | Anterior horn PVWML    | 0.3079  | 0.0249* | 0.2503  | 0.0707  |
|                  | Posterior horn PVWML   | 0.1682  | 0.2287  | 0.0081  | 0.9538  |
|                  | Frontal DWML           | 0.3684  | 0.0066* | 0.301   | 0.0285* |
|                  | Parieto-occipital DWML | 0.3141  | 0.0220* | 0.1345  | 0.337   |
| Middle frontal   | Anterior horn PVWML    | 0.2976  | 0.0304* | 0.2378  | 0.0864  |
|                  | Posterior horn PVWML   | 0.0983  | 0.484   | -0.0024 | 0.9865  |
|                  | Frontal DWML           | 0.3553  | 0.0090* | 0.3065  | 0.0256* |
|                  | Parieto-occipital DWML | 0.216   | 0.1204  | 0.0868  | 0.5368  |
| Medial frontal   | Anterior horn PVWML    | 0.282   | 0.0408* | 0.2535  | 0.067   |
|                  | Posterior horn PVWML   | 0.1161  | 0.4077  | 0.0413  | 0.7689  |
|                  | Frontal DWML           | 0.3368  | 0.0137* | 0.3181  | 0.0203* |
|                  | Parieto-occipital DWML | 0.2673  | 0.053   | 0.1256  | 0.3701  |
| Precuneus        | Anterior horn PVWML    | 0.0252  | 0.8576  | 0.0822  | 0.5582  |
|                  | Posterior horn PVWML   | -0.0345 | 0.8062  | -0.0323 | 0.8184  |
|                  | Frontal DWML           | 0.11    | 0.4329  | 0.0468  | 0.7395  |
|                  | Parieto-occipital DWML | 0.0812  | 0.5633  | 0.0083  | 0.9529  |
| Medial temporal  | Anterior horn PVWML    | 0.2663  | 0.0539  | 0.181   | 0.1946  |
|                  | Posterior horn PVWML   | 0.1427  | 0.3079  | -0.0559 | 0.6908  |
|                  | Frontal DWML           | 0.3023  | 0.0278* | 0.2131  | 0.1256  |
|                  | Parieto-occipital DWML | 0.2496  | 0.0715  | 0.0295  | 0.8338  |
| PCC              | Anterior horn PVWML    | 0.1424  | 0.3091  | 0.1605  | 0.2511  |
|                  | Posterior horn PVWML   | 0.0839  | 0.5505  | 0.1111  | 0.4283  |
|                  | Frontal DWML           | 0.1573  | 0.2607  | 0.1929  | 0.1664  |
|                  | Parieto-occipital DWML | 0.0724  | 0.6062  | 0.1459  | 0.2971  |
| Hyperactivity    |                        |         |         |         |         |
| Superior frontal | Anterior horn PVWML    | -0.4044 | 0.0295* | -0.4783 | 0.0087* |
|                  | Posterior horn PVWML   | -0.3611 | 0.0543  | -0.4614 | 0.0118* |
|                  | Frontal DWML           | -0.1123 | 0.5618  | -0.3351 | 0.0755  |
|                  | Parieto-occipital DWML | -0.2951 | 0.1202  | -0.4655 | 0.0109* |

|                               |                        |         |         |         |         |
|-------------------------------|------------------------|---------|---------|---------|---------|
| Middle frontal                | Anterior horn PVWML    | -0.5197 | 0.0039* | -0.5468 | 0.0021* |
|                               | Posterior horn PVWML   | -0.5158 | 0.0042* | -0.5279 | 0.0032* |
|                               | Frontal DWML           | -0.2118 | 0.2699  | -0.4404 | 0.0168* |
|                               | Parieto-occipital DWML | -0.4039 | 0.0298* | -0.5010 | 0.0056* |
| Medial frontal                | Anterior horn PVWML    | -0.5030 | 0.0054* | -0.5557 | 0.0018* |
|                               | Posterior horn PVWML   | -0.4906 | 0.0069* | -0.5240 | 0.0035* |
|                               | Frontal DWML           | -0.2540 | 0.1837  | -0.4316 | 0.0194* |
|                               | Parieto-occipital DWML | -0.3995 | 0.0318* | -0.5281 | 0.0032* |
| Precuneus                     | Anterior horn PVWML    | -0.2901 | 0.1268  | -0.1739 | 0.367   |
|                               | Posterior horn PVWML   | -0.1862 | 0.3335  | -0.1165 | 0.5472  |
|                               | Frontal DWML           | -0.0672 | 0.7289  | -0.3154 | 0.0956  |
|                               | Parieto-occipital DWML | -0.2635 | 0.1672  | -0.1980 | 0.3031  |
| Medial temporal               | Anterior horn PVWML    | -0.2645 | 0.1655  | -0.3251 | 0.0853  |
|                               | Posterior horn PVWML   | -0.3739 | 0.0457* | -0.3665 | 0.0505  |
|                               | Frontal DWML           | -0.0640 | 0.7413  | -0.1714 | 0.374   |
|                               | Parieto-occipital DWML | -0.1941 | 0.313   | -0.3241 | 0.0863  |
| PCC                           | Anterior horn PVWML    | -0.2833 | 0.1365  | -0.1562 | 0.4186  |
|                               | Posterior horn PVWML   | -0.2355 | 0.2188  | -0.1527 | 0.429   |
|                               | Frontal DWML           | -0.0010 | 0.996   | -0.0081 | 0.9666  |
|                               | Parieto-occipital DWML | -0.2030 | 0.291   | -0.1177 | 0.543   |
| <b>Hallucination/delusion</b> |                        |         |         |         |         |
| Superior frontal              | Anterior horn PVWML    | 0.0949  | 0.6668  | -0.0949 | 0.6668  |
|                               | Posterior horn PVWML   | 0.0899  | 0.6833  | -0.1265 | 0.5652  |
|                               | Frontal DWML           | 0.2264  | 0.299   | 0.0663  | 0.7638  |
|                               | Parieto-occipital DWML | 0.2352  | 0.28    | -0.0899 | 0.6833  |
| Middle frontal                | Anterior horn PVWML    | -0.0306 | 0.8896  | -0.0237 | 0.9145  |
|                               | Posterior horn PVWML   | -0.0652 | 0.7675  | 0.0277  | 0.9003  |
|                               | Frontal DWML           | 0.0728  | 0.7413  | 0.095   | 0.6665  |
|                               | Parieto-occipital DWML | 0.001   | 0.9964  | -0.0375 | 0.8649  |
| Medial frontal                | Anterior horn PVWML    | -0.0010 | 0.9964  | -0.1858 | 0.3961  |
|                               | Posterior horn PVWML   | -0.0682 | 0.7572  | -0.1255 | 0.5683  |
|                               | Frontal DWML           | 0.1164  | 0.5969  | 0       | 1       |
|                               | Parieto-occipital DWML | 0.1403  | 0.5231  | -0.1018 | 0.644   |
| Precuneus                     | Anterior horn PVWML    | -0.0573 | 0.7951  | -0.1294 | 0.5561  |

|                          |                        |         |        |         |        |
|--------------------------|------------------------|---------|--------|---------|--------|
| Medial temporal          | Posterior horn PVWML   | -0.0306 | 0.8896 | 0.0988  | 0.6537 |
|                          | Frontal DWML           | 0.0867  | 0.6941 | -0.0544 | 0.8053 |
|                          | Parieto-occipital DWML | 0.1018  | 0.644  | 0.0296  | 0.8932 |
|                          | Anterior horn PVWML    | 0.1038  | 0.6376 | 0.0771  | 0.7266 |
|                          | Posterior horn PVWML   | 0.2915  | 0.1772 | 0.2342  | 0.282  |
| PCC                      | Frontal DWML           | 0.369   | 0.0831 | 0.3116  | 0.1477 |
|                          | Parieto-occipital DWML | 0.4081  | 0.0532 | 0.1591  | 0.4683 |
|                          | Anterior horn PVWML    | -0.2115 | 0.3327 | -0.2125 | 0.3304 |
|                          | Posterior horn PVWML   | -0.0652 | 0.7675 | -0.0079 | 0.9714 |
|                          | Frontal DWML           | -0.0124 | 0.9553 | 0.0208  | 0.9251 |
|                          | Parieto-occipital DWML | -0.0010 | 0.9964 | -0.0237 | 0.9145 |
| <b>Abnormal behavior</b> |                        |         |        |         |        |
| Superior frontal         | Anterior horn PVWML    | -0.1000 | 0.7699 | -0.2000 | 0.5554 |
|                          | Posterior horn PVWML   | -0.0818 | 0.811  | -0.1818 | 0.5926 |
|                          | Frontal DWML           | 0.1182  | 0.7293 | -0.0364 | 0.9153 |
|                          | Parieto-occipital DWML | -0.0818 | 0.811  | -0.1909 | 0.5739 |
| Middle frontal           | Anterior horn PVWML    | 0.1     | 0.7699 | 0.0091  | 0.9788 |
|                          | Posterior horn PVWML   | 0.1545  | 0.65   | 0.2182  | 0.5192 |
|                          | Frontal DWML           | 0.0182  | 0.9577 | 0.2232  | 0.5094 |
|                          | Parieto-occipital DWML | 0.0455  | 0.8944 | 0.0455  | 0.8944 |
| Medial frontal           | Anterior horn PVWML    | -0.0455 | 0.8944 | -0.1091 | 0.7495 |
|                          | Posterior horn PVWML   | -0.0818 | 0.811  | -0.0727 | 0.8317 |
|                          | Frontal DWML           | 0.1091  | 0.7495 | 0.0592  | 0.8627 |
|                          | Parieto-occipital DWML | -0.1091 | 0.7495 | -0.1091 | 0.7495 |
| Precuneus                | Anterior horn PVWML    | -0.2636 | 0.4334 | -0.2000 | 0.5554 |
|                          | Posterior horn PVWML   | -0.2091 | 0.5372 | -0.0727 | 0.8317 |
|                          | Frontal DWML           | -0.1909 | 0.5739 | -0.1412 | 0.6787 |
|                          | Parieto-occipital DWML | -0.2909 | 0.3855 | -0.2909 | 0.3855 |
| Medial temporal          | Anterior horn PVWML    | 0.2     | 0.5554 | 0.2182  | 0.5192 |
|                          | Posterior horn PVWML   | 0.2455  | 0.4669 | 0.3909  | 0.2345 |
|                          | Frontal DWML           | 0.1545  | 0.65   | 0.369   | 0.2641 |
|                          | Parieto-occipital DWML | 0.2182  | 0.5192 | 0.2818  | 0.4011 |
| PCC                      | Anterior horn PVWML    | 0.0727  | 0.8317 | 0.2364  | 0.4841 |
|                          | Posterior horn PVWML   | 0.2545  | 0.45   | 0.3909  | 0.2345 |

|                        |         |        |        |        |
|------------------------|---------|--------|--------|--------|
| Frontal DWML           | -0.1455 | 0.6696 | 0.3052 | 0.3614 |
| Parieto-occipital DWML | -0.0727 | 0.8317 | 0.1909 | 0.5739 |

rhGM: regional hypoperfusion of gray matter; PVWML: periventricular white matter lesion; DWML: deep white matter lesion; PCC: posterior cingulate cortex.

Supplemental Table 6. Statistical data of Spearman's multivariate analysis for the connectivity between rhGM and WML in each symptom of subcategories of BPSD in AD type dementia and aMCI.

| rhGM             | WML                    | AD type |         |         |        | aMCI   |        |        |         |
|------------------|------------------------|---------|---------|---------|--------|--------|--------|--------|---------|
|                  |                        | Left    |         | Right   |        | Left   |        | Right  |         |
|                  |                        | rs      | p       | rs      | p      | rs     | p      | rs     | p       |
| Hypoactivity     |                        |         |         |         |        |        |        |        |         |
| Superior frontal | Anterior horn PVWML    | 0.2585  | 0.1027  | 0.208   | 0.1919 | 0.4406 | 0.1517 | 0.2517 | 0.4299  |
|                  | Posterior horn PVWML   | 0.1087  | 0.4987  | -0.0370 | 0.8182 | 0.4266 | 0.1667 | 0.2238 | 0.4845  |
|                  | Frontal DWML           | 0.3305  | 0.0348* | 0.2295  | 0.149  | 0.4238 | 0.1698 | 0.4507 | 0.1414  |
|                  | Parieto-occipital DWML | 0.2232  | 0.1607  | 0.0864  | 0.5911 | 0.5105 | 0.0899 | 0.1748 | 0.5868  |
| Middle frontal   | Anterior horn PVWML    | 0.2559  | 0.1063  | 0.166   | 0.2995 | 0.4196 | 0.1745 | 0.4406 | 0.1517  |
|                  | Posterior horn PVWML   | 0.0172  | 0.9148  | -0.0649 | 0.6869 | 0.4406 | 0.1517 | 0.3147 | 0.3191  |
|                  | Frontal DWML           | 0.3066  | 0.0512  | 0.2159  | 0.1753 | 0.5114 | 0.0893 | 0.6338 | 0.0269* |
|                  | Parieto-occipital DWML | 0.1216  | 0.4488  | 0.0148  | 0.9268 | 0.4406 | 0.1517 | 0.3287 | 0.2969  |
| Medial frontal   | Anterior horn PVWML    | 0.2218  | 0.1634  | 0.1897  | 0.2348 | 0.4755 | 0.1182 | 0.4196 | 0.1745  |
|                  | Posterior horn PVWML   | 0.0779  | 0.6284  | -0.0225 | 0.8891 | 0.3566 | 0.2551 | 0.2937 | 0.3541  |
|                  | Frontal DWML           | 0.2947  | 0.0614  | 0.2359  | 0.1376 | 0.4729 | 0.1205 | 0.5775 | 0.0493* |
|                  | Parieto-occipital DWML | 0.2186  | 0.1696  | 0.0704  | 0.6619 | 0.3916 | 0.2081 | 0.2517 | 0.4299  |

|                      |                               |         |        |         |        |         |        |         |         |
|----------------------|-------------------------------|---------|--------|---------|--------|---------|--------|---------|---------|
| Precuneus            | Anterior horn<br>PVWML        | 0.1253  | 0.4352 | 0.1479  | 0.3561 | -0.2378 | 0.4568 | -0.2028 | 0.5273  |
|                      | Posterior horn<br>PVWML       | -0.0134 | 0.9337 | -0.0207 | 0.8976 | -0.0909 | 0.7787 | -0.0979 | 0.7621  |
|                      | Frontal<br>DWML               | 0.2556  | 0.1067 | 0.0734  | 0.6483 | -0.2067 | 0.5193 | -0.2465 | 0.4399  |
|                      | Parieto-<br>occipital<br>DWML | 0.1772  | 0.2678 | 0.092   | 0.5673 | -0.0629 | 0.8459 | -0.3497 | 0.2652  |
| Medial<br>temporal   | Anterior horn<br>PVWML        | 0.2055  | 0.1974 | 0.1425  | 0.3741 | 0.4755  | 0.1182 | 0.2448  | 0.4433  |
|                      | Posterior horn<br>PVWML       | 0.1327  | 0.4083 | -0.0413 | 0.7977 | 0.2937  | 0.3541 | -0.0839 | 0.7954  |
|                      | Frontal<br>DWML               | 0.2448  | 0.1229 | 0.1451  | 0.3655 | 0.4799  | 0.1144 | 0.4437  | 0.1485  |
|                      | Parieto-<br>occipital<br>DWML | 0.2202  | 0.1665 | 0.0448  | 0.781  | 0.2727  | 0.3911 | 0.028   | 0.9312  |
| PCC                  | Anterior horn<br>PVWML        | 0.0984  | 0.5404 | 0.0563  | 0.7268 | 0.3566  | 0.2551 | 0.4266  | 0.1667  |
|                      | Posterior horn<br>PVWML       | 0.073   | 0.6501 | 0.0816  | 0.6119 | 0.2727  | 0.3911 | 0.2517  | 0.4299  |
|                      | Frontal<br>DWML               | 0.1009  | 0.5303 | 0.0389  | 0.8093 | 0.3783  | 0.2253 | 0.5141  | 0.0873  |
|                      | Parieto-<br>occipital<br>DWML | 0.0679  | 0.673  | 0.1436  | 0.3706 | 0.1399  | 0.6646 | 0.1958  | 0.5419  |
| <b>Hyperactivity</b> |                               |         |        |         |        |         |        |         |         |
| Superior<br>frontal  | Anterior horn<br>PVWML        | -0.3699 | 0.1084 | -0.4030 | 0.0781 | -0.4667 | 0.2054 | -0.5333 | 0.1392  |
|                      | Posterior horn<br>PVWML       | -0.3008 | 0.1976 | -0.2782 | 0.235  | -0.3833 | 0.3085 | -0.7500 | 0.0199* |
|                      | Frontal<br>DWML               | -0.1158 | 0.6269 | -0.2505 | 0.2868 | 0.05    | 0.8984 | -0.3431 | 0.366   |
|                      | Parieto-<br>occipital<br>DWML | -0.3263 | 0.1603 | -0.2737 | 0.243  | -0.3167 | 0.4064 | -0.7833 | 0.0125* |



|                 |                        |         |         |         |         |         |        |         |         |
|-----------------|------------------------|---------|---------|---------|---------|---------|--------|---------|---------|
| Middle frontal  | Anterior horn PVWML    | -0.4556 | 0.0435* | -0.5053 | 0.0231* | -0.6167 | 0.0769 | -0.5167 | 0.1544  |
|                 | Posterior horn PVWML   | -0.4677 | 0.0376* | -0.4000 | 0.0806  | -0.6000 | 0.0876 | -0.7500 | 0.0199* |
|                 | Frontal DWML           | -0.2286 | 0.3324  | -0.4152 | 0.0687  | -0.1833 | 0.6368 | -0.4519 | 0.222   |
|                 | Parieto-occipital DWML | -0.4586 | 0.0420* | -0.3323 | 0.1523  | -0.5333 | 0.1392 | -0.7833 | 0.0125* |
| Medial frontal  | Anterior horn PVWML    | -0.4722 | 0.0355* | -0.4917 | 0.0277* | -0.5500 | 0.125  | -0.5833 | 0.0992  |
|                 | Posterior horn PVWML   | -0.4271 | 0.0604  | -0.3549 | 0.1247  | -0.5667 | 0.1116 | -0.8500 | 0.0037* |
|                 | Frontal DWML           | -0.2902 | 0.2145  | -0.3956 | 0.0842  | -0.0833 | 0.8312 | -0.4100 | 0.273   |
|                 | Parieto-occipital DWML | -0.4376 | 0.0537  | -0.3759 | 0.1023  | -0.4667 | 0.2054 | -0.8667 | 0.0025* |
| Precuneus       | Anterior horn PVWML    | -0.4451 | 0.0492* | -0.2767 | 0.2376  | -0.0500 | 0.8984 | -0.1667 | 0.6682  |
|                 | Posterior horn PVWML   | -0.4075 | 0.0745  | -0.2331 | 0.3227  | 0.1833  | 0.6368 | 0       | 1       |
|                 | Frontal DWML           | -0.1744 | 0.462   | -0.3791 | 0.0993  | 0.2     | 0.6059 | -0.2008 | 0.6044  |
|                 | Parieto-occipital DWML | -0.4316 | 0.0574  | -0.2211 | 0.349   | -0.0500 | 0.8984 | -0.1667 | 0.6682  |
| Medial temporal | Anterior horn PVWML    | -0.1880 | 0.4274  | -0.2992 | 0.1999  | -0.4000 | 0.2861 | -0.1833 | 0.6368  |
|                 | Posterior horn PVWML   | -0.2346 | 0.3195  | -0.1714 | 0.4699  | -0.4833 | 0.1875 | -0.4833 | 0.1875  |
|                 | Frontal DWML           | 0.0105  | 0.9649  | -0.1143 | 0.6313  | -0.1667 | 0.6682 | -0.1004 | 0.7971  |
|                 | Parieto-occipital DWML | -0.1188 | 0.6179  | -0.1549 | 0.5144  | -0.4833 | 0.1875 | -0.4833 | 0.1875  |
| PCC             | Anterior horn PVWML    | -0.3368 | 0.1464  | -0.2917 | 0.212   | -0.2167 | 0.5755 | 0.0667  | 0.8647  |

|                               |                               |         |        |         |        |         |        |         |        |
|-------------------------------|-------------------------------|---------|--------|---------|--------|---------|--------|---------|--------|
|                               | Posterior horn<br>PVWML       | -0.3534 | 0.1264 | -0.1895 | 0.4237 | -0.1000 | 0.798  | -0.1667 | 0.6682 |
|                               | Frontal<br>DWML               | -0.0917 | 0.7005 | -0.1557 | 0.5122 | 0.1667  | 0.6682 | 0.3096  | 0.4175 |
|                               | Parieto-<br>occipital<br>DWML | -0.3038 | 0.1929 | -0.1203 | 0.6134 | -0.0667 | 0.8647 | -0.1667 | 0.6682 |
| <b>Hallucination/delusion</b> |                               |         |        |         |        |         |        |         |        |
| Superior<br>frontal           | Anterior horn<br>PVWML        | 0.1789  | 0.4503 | 0.018   | 0.9398 |         |        |         |        |
|                               | Posterior horn<br>PVWML       | 0.1278  | 0.5912 | -0.0647 | 0.7865 |         |        |         |        |
|                               | Frontal<br>DWML               | 0.2287  | 0.3322 | 0.0075  | 0.9749 |         |        |         |        |
|                               | Parieto-<br>occipital<br>DWML | 0.218   | 0.3557 | -0.0421 | 0.8601 |         |        |         |        |
| Middle<br>frontal             | Anterior horn<br>PVWML        | 0.0707  | 0.7672 | 0.0556  | 0.8158 |         |        |         |        |
|                               | Posterior horn<br>PVWML       | -0.0090 | 0.9699 | 0.0782  | 0.7431 |         |        |         |        |
|                               | Frontal<br>DWML               | 0.0755  | 0.7518 | 0.0648  | 0.7862 |         |        |         |        |
|                               | Parieto-<br>occipital<br>DWML | -0.0165 | 0.9448 | 0.003   | 0.99   |         |        |         |        |
| Medial<br>frontal             | Anterior horn<br>PVWML        | 0.0707  | 0.7672 | -0.0647 | 0.7865 |         |        |         |        |
|                               | Posterior horn<br>PVWML       | -0.0632 | 0.7914 | -0.0256 | 0.9148 |         |        |         |        |
|                               | Frontal<br>DWML               | 0.114   | 0.6324 | -0.0602 | 0.8008 |         |        |         |        |
|                               | Parieto-<br>occipital<br>DWML | 0.1248  | 0.6001 | -0.0331 | 0.8899 |         |        |         |        |
| Precuneus                     | Anterior horn<br>PVWML        | -0.0812 | 0.7336 | -0.1504 | 0.5269 |         |        |         |        |

|                    |                               |         |         |         |        |
|--------------------|-------------------------------|---------|---------|---------|--------|
| Medial<br>temporal | Posterior horn<br>PVWML       | -0.1173 | 0.6224  | 0.0331  | 0.8899 |
|                    | Frontal<br>DWML               | 0.0513  | 0.8299  | -0.1084 | 0.6491 |
|                    | Parieto-<br>occipital<br>DWML | 0.0256  | 0.9148  | -0.0135 | 0.9548 |
|                    | Anterior horn<br>PVWML        | 0.1444  | 0.5437  | 0.1023  | 0.6678 |
|                    | Posterior horn<br>PVWML       | 0.3729  | 0.1053  | 0.2678  | 0.2537 |
|                    | Frontal<br>DWML               | 0.3525  | 0.1275  | 0.3104  | 0.1829 |
|                    | Parieto-<br>occipital<br>DWML | 0.4466  | 0.0484* | 0.2279  | 0.3338 |
|                    | Anterior horn<br>PVWML        | -0.2180 | 0.3557  | -0.1594 | 0.5021 |
|                    | Posterior horn<br>PVWML       | -0.0827 | 0.7289  | 0.015   | 0.9498 |
|                    | Frontal<br>DWML               | -0.0717 | 0.7639  | -0.0512 | 0.8302 |
|                    | Parieto-<br>occipital<br>DWML | -0.0466 | 0.8453  | 0.0165  | 0.9448 |
|                    |                               |         |         |         |        |

---

rhGM: regional hypoperfusion of gray matter; PVWML: periventricular white matter lesion; DWML: deep white matter lesion; PCC: posterior cingulate cortex.
